# Supplementary material
Source: PubMed Central journal article supplement (PMC7402098)
Supplement: mmc1.pdf [file mmc1.pdf]

## FACE SHIELD DISINFECTANT PROTOCOL

Images adapted from: <https://www.prusaprinters.org/prints/25857-prusa-protective-face-shield-rc3>

### Prepare the disinfectant solution

- a. Mix one cup of household bleach with three gallons of water.
- b. Place in a container with a large enough opening to submerge the face shield components.

### Disassemble the face shield

Disassemble the face shield in the following order:

- a. Remove the “head strap” (tourniquet) from the “head band”
- b. Remove the “chin” by gently pulling downward on the chin piece while gripping the face shield
- c. Remove the clear “face guard” by gently pulling it off the pins on the “head band”

### Decontaminate the face shield

- a. Soak the “head band” and the “chin” in the disinfectant solution for 5 minutes
- b. Wipe the “face guard” clean with disinfectant solution or a disinfectant wipe
- c. Allow all parts to air-dry completely, no not rinse
- d. Once, dry, wipe face guard clean of any spots

### Reassemble the face shield

- a. Re-attach the “face guard” on the “head band” by aligning the pins and punched holes. Gently push the “face guard” onto the “head band” (panels A and B)
- b. Gently slide the “chin” onto the bottom of the “face guard” (panel C)
- c. Attached the “head strap” to each side of the “head band” (panel D)

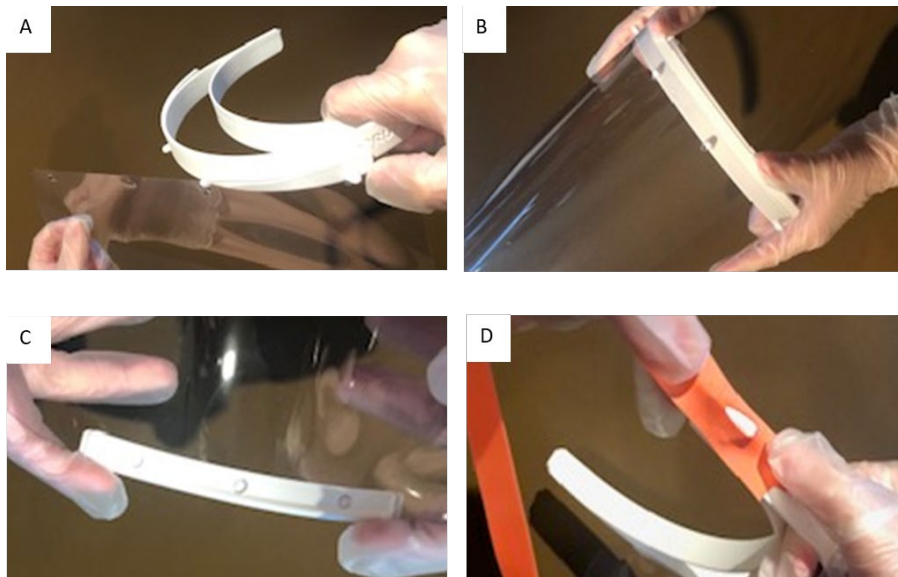

Ref: <https://www.prusaprinters.org/prints/25857-prusa-protective-face-shield-rc3>
